# Supplementary material for: Modification of ginsenoside saponin composition via the CRISPR/Cas9-mediated knockout of protopanaxadiol 6-hydroxylase gene in Panax ginseng
Source: PubMed Central journal article supplement — J Ginseng Res. 2021 Jun 18;46(4):505–14. doi: 10.1016/j.jgr.2021.06.004 (PMC9270645; doi:10.1016/j.jgr.2021.06.004), 2021-06-18
Supplement: mmc1.pdf [file mmc1.pdf]

Fig. S1. Two genomic sequences (PPTg and PPTa) of PPT synthase gene retrieved from genomic nucleotide sequence of Pg\_scaffold1770 and Pg\_scaffold0325 in the Ginseng genome database accessed at <http://ginsengdb.snu.ac.kr/>. The genomic sequence for *CYP716A53v2* gene was named as PPTg and a paralog sequence was named as PPTa. Blue color letters indicate exon region and green color letters indicate intron region.

>PPTg

```
ATGGATCTCTTTATCTTATCTCAACTACTTCTTCTACTAGTCTTTTGCTTATTCCTCTTTTGGAAATTTCAAACCA
AGTAGCCAAAACAAACTGCCTCCGGGCAAAAACAGGATGGCCCATAAATGGAGAAACACTAGAATTCATCTCCTGT
GGCCAAAAGGCAACCCTGAAAAGTTCGTAACACAAAAGAAATGAACAAATACTCCCTGATGTCTTCACAACATCC
TTAGCAGGCGAGAAAATGGTAGTTTTCTGCGGTGCCCTCGGGGAACAAAATTCATTTTTCTCCAACGAAAACAAGCTT
GTTGTGTCTCCTGGTGGCCCCCTGCCATATCCAAAATCCTAACTGCAACAATACCTTCGGTAGAGAAAAGCAAAGCC
TTGCGGAGTCTAATTGTTGAATTTCTTAAAACCCGAAAGCGCTCCACAAGTTTATTTCTGTCATGGATCGGACAACG
AGGCAGCACTTTGAAGACAAATGGTTTGAATACTCTCTCTCTAAAATTTTTATCCGTCTTTTTGGAGAGATTTTG
TGTATGTTTGATTACACAGGGTTTGGAGCGTTTAGTGCAGGGACGGATCCAGCCTTTTTTCGTAATTCAGTGGGTC
AAATTCGAAAAAAAACCTTGAGAATAAAAATTTTAAACATGAAACACAACCTAAATAATTTCTCAAAATATTATTTA
CAATAATATTTTTCGAAATTTTCATTGCTTGAATTTGTTACGTGATAACCTCATTTTTTAATAATTTCTCCATCCGT
CCCCAGATAAAAAGTTTTAGTTGACTTTTTATGCATATTAAGAAAAAAGATAAAAATGGCAAAAATGTCCATATTTA
AATTCTCATTTAATTGCATAGTTTTTTTGCACATTACTAGTGATGCTCCATTAATATGCATAGAGAATAAAAAATAT
AACAAATTTATAATAAGGGTATTATAGACAAAATTAATGTAAAAAATATATCATTTAAAGTAAGTAGACATTTAACT
TGTGACTACCTAAAATAGTATTAAGACTTTTACCTTGGACGGAGGGAGTATAAAAATACCACGCTCAATGTAAG
TTAATAAACAGTCATTCATCCATTCATCTCTCATTTAGTTACGGAGTTCATTTTTTTCGATATTCATAGCTGAAA
ATGTGCTTTCAACAGTTAAGTAGCAACACAAAAGTAGAGTCAATTTCAACAACAAAATAGACTTGAGGATACATAT
CATCATTTTTTTTTCTTAATTTATTCATATCAATAAAAATGTTTTCATATAAAATTTTAACTTGAAAATACCTCAC
CTTAATATCAAAGTTGATTCTCTATTTGGAACGGATAATGGAGATACTAAATTAATCTCCCTCAAGCATTAGAGAAG
GAAAAAAAATCTAAATTTATTTATATACTATCTCTCCCTAAAATTTGTATAAAGAAAAAGAAAATTTAGAATGAG
ACAGTGAATGAATTTTTTTTTAAATAGAAAATAATGAGTAAATAATAAAGAAAAGAAAAGAGTCTGATAGGAAATAAA
TGTTAGAGATAAAAATGTGTATAAAAATTAAGAGAGAGAAATGAATAAAAAAATTAATAATAAACAAAATTT
TTAGAGAGGAAAATTAATTTAGGGGATGTTAAGTTGAATTCATATTTTATTGTTGTTAAATGTTGAGAAAAAAA
TACAGAAATCAAATAAATTTGAACTGTTAAAAAGAGTACAATATTTTTTAAAGAAAAAACAAAAGAGAACAATG
TTTTATTAGTTATACGCAAGAGAAAAAATAAGACTGAATAATTTATACGAAAAATGTACAGTTGATATTTGATAATT
TAATGTGACACAGTGGGAGTATACAAAATATGCACCCAATTTGACAATTAATTTTCACTTTCATCCTTTAATATA
TTTTAGAAGAGTACTTTTATTTATGTGTTTTCTTCTAAATCATGAATTAATAAATTAGGAACGGGAGTACAGAAGTG
AAAGCTTTCGCTATGTCAGAGTCGCTGACTTTTGTAGTTGGCTGTTGGCTGCTCTTTAGCATAAATGATCCGGTG
CAGGTGCAGAAGCTTTCTCATCTTTTTGAGAAGGTTAAAGCGGATTAATGTCCTTACCTTTAAATTTTCCGGGC
ACGGCTTTTTAACCGTGGGATCAAGGCCGCAATCTTATTAGAAAAGAGCTTTCGGTGGTGATAAAAACAGAGGAGA
AGTGATAAATACAGACTCGAAAGGATCTTTTGTCCACGTTATGCTTTCCAATGGCGAGGGCGAGAAAATTTTTTC
AGCGAAATGGATATTGCGGACGTTGTTCTTAATTTACTGATTGCTAGCCATGATACCAC TAGCAGTGCCATGGGC
TCTGTGGTCTACTTTCTTGCAGATCATCCTCACATCTATGCTAAAAGTCCCTCACAGGTAAACAAACACATGCACAA
CTTGTTTTAAGTTATAAGTCATTATGGAACCAGCATAAATTAATTTATGGGAATTTGTTTTAAGTTATAAGTCATTA
TGGAACCAACATAAATTTATTTATGTATAGCGACACTTTTGTGTGAAAATAACATTTTCGGTTGTGGATTTAACA
GTTTTTCATTAATTTAATTTAATGGATTTACTTTGGTCTATATATATAGAACAAATGGAGATCGCAAAGTCGAAAGG
GGCAGGAGAACTTTTGAGCTGGGAGGACATAAAGAGGATGAAGTATTCCCGCAATGTTATAAACGAAGCTATGAG
ATTAGTACCTCCTTCTCAAGGAGGTTTTAAAGTAGTTACAAGTAAATTCAGTTACGCAAACCTTCATCATTTCCCAA
AGGATGGAAGGTATGTTTGTCAATTTAAATACTGCTTCTGTTTTCAATAAAGTAATTCATTTTTTTTTTAAAGGAGTA
TAAAATTTATAAATATTTTTAAGCTTGTCAATATAAATTAAGGCGCAACGCATTTCCACATTTTTTCCCTTAGCTAA
AGGCAAAAAAATTTATGAGACTTCCAAGATCTAAAAAATCTTTGATAGTCTAAAAAATTTAATTAATTAATG
CTGGGTTATATGAAGCACAAAATGATAAGAAGACATTTTTTAATTTGTTGCAAGCCCATCATGTTATGTTGAGG
AACATATTAATAATCGCAGATCTTCGTCGCGTTGATAAAAAAAGAAAAAAGAAAGACAAGGCAAGGCAAGGCAAGG
CAGGAAATGAAATTTCTTCGTCATGTTCTGCTAAATGAAAGGTGTTGGGATAGGGTTAGGCCTAGGGTTAGGG
TTTTGTGAGGAAGGATGATGGAGAAGGACAATGGCAATGGTGTTTTTTTTAGAGATTTTGTGTGCTGGAGAAA
GAGGACAATTTGGCAAGACCACTGTTAGTGGGTACCTAATGACCGTTTTTTATCAAAGAATACAACGTACATTAC
AAATCTTCCCTCCATTTTAATCTTCCAACATATGCCATACATAACCTGAAATAAAAATATAAATTTTGAAGTATTAA
ATAAAAAATAATAATATAAAAAATGTATTATTTAATGCTATATTTATACGGTCCCGTTCTCTAGTGAACATAAAG
TATCGAACAAAAACGAACCGGCTATAACAACGATTTTTTCCGTCGTTATAACATACAAAGCCGACGACATAGCT
ATGGCGATGGTTCTATCTGTGCTATATCTTAAAAAACCCTGCTTATAGCCAGTTCATTTTTGGTCCACTCTCT
ACGGTTTACTGGAGAAGGGGAATAATTTATATATTTAAAAATATAGCATTAATATTTGTAATTTTTCAAATGG
```

TAAGAGGAAGCGAAGCGAGTACTATATACTCTCAAGCTAAAGAATCTGCATTTGTTTCATCATCTGTTCCAAGTTA  
GGGATATATTTCTTAAACGACGACTAGCAAGGAAAACATAAATTTTACAAAATATATATTTCTAGTAGCAGTCCGT  
ACAGTATGACATAATAATATTTTATCTACCTATAATTAGTAATGAAATGTTAGGATTTTCATGCTTTTTGTACAAA  
CATAAAAATATACTTCTAATTTTGTGCTTGTGCAGATCTTTTGGAGCGTATACTCGACACATAAAGATCCCAAAT  
ACTTTAAAAATCCAGAGGAGTTTGATCCTTCAAGATTTGAAGGAGATGGACCTATGCCATTCACATTTATACCAT  
TTGGAGGAGGACCAAGGATGTGCCCTGGGAGTGAGTTTGTCTCGTCTGGAGGTACTAATATTCATGCACCATTTGG  
TTACCAATTTTAAAGTGGGAGAAGGTGTTTCCCAATGAAAAAGATTATTTATACTCCATTTCCCTTCCCGGAGAATG  
GTCTTCTTATTCGTCTATCACCTTGTACGCTTTAA

>PPTa

ATGGATCTCTTTATCTTATCTCAACTACTTCTTCTACTAGTGTTTTGCTTATTCCTCTTTTGGAAATTTCAAACCA  
AGTAGCCAAAACAAATTTCTCCGGGCAAAACAGGATGGCCCATAAATCGGAGAAACAATAGAATTCATCTCCTGT  
GGCCAAAAGGCAACCCTGAAAAGTTTCGTAACACAAAAGAAATGAAGAAATACTCCCTGATGTCTTCACAACATCC  
TTAGCAGGCGAGAAAATGGTAGTTTTCTGCGGTGCCCTCGGGGAACAAAATTCATTTTCTCCAACGAAAACAAGCTT  
GTTGTGTCTGGTGGCCCCCTGCCATATCCAAAATCCTAACTGCAACAATACCTTCGGTAGAGAAAAGCAAAGCC  
TTGCGGAGTCTAATTGTTGAATTTCTTAAAACCCGAAGCGCTCCACAAGTTTATTTCCGGTCATGGATCGGACAACA  
AGGCAGCACTTTGAAGACAAATGGTTTGTATTACTTTCTATCTACTAAATTTTTATGTCTTTTTTGGAGAGATATT  
TTTTGTATGTTTTGGTTACTCAGCGTTGCAGGGAGACTCGTTCATAATTCATGGGTCAAAATTCGAAAAAAAACCT  
TGAGAAATAAAAATTTAATAACATGAAAAATAACTAAATAATTTCAAATATTTTACAATAACATTTTTTCGAGG  
TTTCATTGCTTGAATTTATTACGTGATAACCTCATTGTTAATAAACAGTCAATTCATCCATTCATCTCCCATTTAA  
TTACGGAGTTCATTCTTCGCGATATTTATGGTTGAAAATGTGCTTTCAACAGTTACAGTAGCAACGGACAAAAGC  
AGAGTCAATTTTAGCAACAAATAGAATTAAGGATACATATCATCATTTCTTTTCTTAATTTAGTCATATCATTTAA  
AAATATATTCATATCAATTTTAAACCTGAAAATACCTCACCTTAATATCAAAGTTGATTCCTATTTGGAAAGGA  
GATACTAAATTAATCAATCAAGCATTAGAGAAGGAAAAAATCTAAATTTATGATATACTATCTCTCCCTAAAA  
TTTTGTATAAAGAGAAAAGAAAATTTAGAGTAAGACGGTGAATACAATTTTTTTTAAATAGAAATAATGAGTAAATAG  
TAAAAGAAAAGAAAGTGTGCTGCTAGGAAATAAATGTTAGAGATAAAAATGTGTATAAAAATCAAAGAGAGAAATTG  
AATAAAAAATTTTAAATTAATATAACAAAATTTTAGAGAGGAAATTAATTTATGGGATGTTAAGTTGAATTCAA  
TATTTATTGTTGTTAAATGTTGAGAAAAATAATACAAAAATCAAATAAATGTAACCGTTAAAAAGAGTACAATT  
TTTTTAAAGAAAAAACAAAAGAGTACAATTGTTTATTAATTAATAAGCAAGAGAAAAAATAAGTATAGTTGATATT  
TGATACTTTAATGTGACACATTGGAAGTATACTTTATTTATGACAATTAATTTTCACTTTTCATCCTTTAATATAT  
TTGAGAAGAGTACTTTATTTATGGTTTTTTTCTTCTAAATCATGAATTAATAATTTAGGAACGGGAGTACAGAAGTG  
AAAGCTTTCCCTATGTGAGAGACGCTGACTTTTGGAGTTGGCTGTGGCTGCTCTTTAGCATAAATGATCCGGTG  
CAGGTGCAGACGCTTTCTCATCTTTTTGAGAAGGTTAAAGCGGGATTATTTGTCCTTACCTTTAAATTTTCCGGGC  
ACGGCTTTTAAACCGTGGGATCAAGGCCGCAATCTTATTAGAAAAGAGCTTTTCGGTGGTGATAAAAACAGAGAAGT  
GATAAATTACAACTCGATAGGATCTTTTGTCCCAGTTATGATTTCCAATGGCGAGGGCGAGAAATTTTTCAGC  
GAAATGGATATTGCGGACGTTGTTCTTAATATACTTATTGCTAGCCATGATACCACTAGCAGTCCATGGGCTCT  
GTGGTCTACTTTCTTGACATCATCTCACATCTATGCTAAGTCTTCGCAGGTAAACAAAACACATGCACAACCTG  
GTTTTAAGTTATAAGTCATTACGGAACGGGCATAAATTAATTTAATTTACTGGATTTACTTTTGGTCTATAATATAT  
AGAACAAATGGAGATTGCAAAGTCGAAAAGGGGCAGGAGAACTTTTGGAGCTGGGAGGACATAAAGAGGATGAAGTA  
TTCCCGCAATGTTATAAACGAAAGCTATGAGATTAGTACCTCCTTCTCAAGGAGGTTTTAAAGTAGTTACAAGTAA  
ATTCAGTTACGCAAACTTCATCATTTCCCAAAGGATGGAAGGTATGTTTTTAAACGGAAGTGGTTAGTATAAAGTTT  
ATTTTGGGGTAAGTTGGTCAATTAACATAAATAGATACTGACACGCAGACGAGGTTGTATGTGTACGTGTCGGT  
ATTCTAGTGGTCAATTGACCAACTTACTAAAGAAATAACTCCATGCTAACCGGATCCGTTTTTAAACGAGTATAAA  
ATTATAAAAATATTTTTAAGTTTGTGCATCATAATTTTATGATTTATATAATTTTTTGGATAGCCCAATAATAAAGG  
CGCAACGCATTTACCATTTTTTCCCTTAGCTAAAGGCAAAAAAATTTTATGAGACTTCCAAGACCTAAAAAATCT  
TTGATAGTCTAAAAAAAATTAATTAATGCTGGGTTATATGAAGCACAAAATGATAAGAAATTTTTTAATTTGTT  
GTCAGCCCATCATGTTATGTTGAGCAAGATATTAATAATCGCAAAATCTTCATCGTGCATGCGTTGATAAAAAACA  
AAAAGATAATAATATATAAAAATATATATTTCTAGTAGCAGTCCCTGACAGTATGACATAATAATATTTTATCTACC  
TATAATTAGTAATGAAATGTTAGGATTTTCATTCCTTTTGTACAAAACATAAAAAATATACTTCTAATTTTGTGCTTG  
TGCAGATCTTTTGGAGCGTATACTCGACACATAAAGATCCCAAATACTTTAAAAATCCAGAGGAGTTTGATCCTT  
CAAGATTTGAAGGAGATGGACCTATGCCATTCACATTTATACCATTTGGAGGAGGACCAAGGATGTGCCCTGGGA  
GTGAGTTTGTCTGTCTGGAGGTACTAATATTCATGCACCATTTGGTTACCAATTTTAGGTGGGAGAAGGTGTTTC  
CCAATGAAAAGATTATTTATACTCCATTTCCCGTCCCGGAGAATGGTCTTCTATTCGTCTATCACCTTGTACGT  
TTTTAA
