# Supplementary material for: Modification of ginsenoside saponin composition via the CRISPR/Cas9-mediated knockout of protopanaxadiol 6-hydroxylase gene in Panax ginseng
Source: PubMed Central journal article supplement — J Ginseng Res. 2021 Jun 18;46(4):505–14. doi: 10.1016/j.jgr.2021.06.004 (PMC9270645; doi:10.1016/j.jgr.2021.06.004), 2021-06-18
Supplement: mmc2.pdf [file mmc2.pdf]

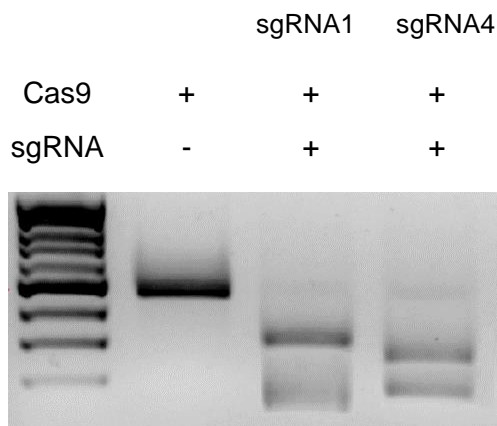

Fig. S1. *In vitro* cleavage assay of two different sgRNAs targeting the PPT synthase locus. A PCR fragment containing the targeted PPT synthase gene sequence was synthesized and mixed with Cas9 and each sgRNA (sgRNA1 and sgRNA4). A negative control that lacked sgRNA was included for comparison. Cleavage efficiency was assessed by agarose gel electrophoresis.
