# Supplementary material for: Modification of ginsenoside saponin composition via the CRISPR/Cas9-mediated knockout of protopanaxadiol 6-hydroxylase gene in Panax ginseng
Source: PubMed Central journal article supplement — J Ginseng Res. 2021 Jun 18;46(4):505–14. doi: 10.1016/j.jgr.2021.06.004 (PMC9270645; doi:10.1016/j.jgr.2021.06.004), 2021-06-18
Supplement: mmc3.pdf [file mmc3.pdf]

Table S1. Indel frequency in target site (sgRNA1) and off-target site (sgRNA4) in CRISPR/Cas9-mediated mutant lines (Cr4, Cr7, and Cr14) by Deep sequencing

| Mutant line | Target site sequence (sgRNA1) |           |          |           |                     | Off target site sequencing (sgRNA4) |           |          |           |                     |
|-------------|-------------------------------|-----------|----------|-----------|---------------------|-------------------------------------|-----------|----------|-----------|---------------------|
|             | Total read                    | Wild-type | Deletion | Insertion | Indel frequency (%) | Total read                          | Wild-type | Deletion | Insertion | Indel frequency (%) |
| Cr4         | 98,146                        | 0         | 47,883   | 50,263    | 100                 | 86,550                              | 86,540    | 10       | 0         | 0                   |
| Cr7         | 101,867                       | 0         | 101,867  | 0         | 100                 | 89,411                              | 89,406    | 5        | 0         | 0                   |
| Cr14        | 135,931                       | 630       | 134,689  | 0         | 99.5                | 120,380                             | 120,364   | 16       | 0         | 0                   |
